# Supplementary material for: Circulating cytokines in predicting development of severe acute pancreatitis
Source: PubMed Central journal article supplement (PMC4095695; doi:10.1186/cc13885), 2014-05-21
Supplement: cc13885-S1.pdf [file cc13885-S1.pdf]

**Additional file 1. Diagnostic performances of the fourteen cytokines differing between mild or moderately severe AP and severe AP.**

| Predictive marker with optimal cut off point | AUC                 | Sensitivity (%)     | Specificity (%)     | +LR               | -LR                 | DOR                |
|----------------------------------------------|---------------------|---------------------|---------------------|-------------------|---------------------|--------------------|
| G-CSF (>477.7 pg/ml)                         | 0.76<br>(0.66-0.86) | 40.0<br>(23.4-59.3) | 93.5<br>(88.1-96.5) | 6.1<br>(2.8-13.6) | 0.64<br>(0.47-0.89) | 9.6<br>(3.4-27.2)  |
| GRO $\alpha$ (>140.0 pg/ml)                  | 0.81<br>(0.72-0.91) | 44.0<br>(26.7-62.9) | 92.0<br>(86.3-95.5) | 5.5<br>(2.7-11.3) | 0.61<br>(0.43-0.86) | 9.1<br>(3.3-24.7)  |
| HGF (>3020.1 pg/ml)                          | 0.87<br>(0.81-0.94) | 60.0<br>(40.7-0.77) | 92.8<br>(87.1-96.0) | 8.3<br>(4.2-16.3) | 0.43<br>(0.27-0.70) | 19.2<br>(6.9-53.6) |
| IL-2R $\alpha$ (>567.6 pg/ml)                | 0.81<br>(0.72-0.90) | 32.0<br>(17.2-51.6) | 90.6<br>(84.6-94.4) | 3.4<br>(1.6-7.3)  | 0.75<br>(0.57-0.99) | 4.5<br>(1.6-12.5)  |
| IL-6 (>501.6 pg/ml)                          | 0.81<br>(0.72-0.90) | 48.0<br>(30.0-66.5) | 93.5<br>(88.1-96.5) | 7.4<br>(3.5-15.6) | 0.56<br>(0.38-0.81) | 13.2<br>(4.7-37.3) |
| IL-8 (>88.1 pg/ml)                           | 0.85<br>(0.77-0.92) | 48.0<br>(30.0-66.5) | 93.5<br>(88.1-96.5) | 7.4<br>(3.5-15.6) | 0.56<br>(0.38-0.81) | 13.2<br>(4.7-37.3) |
| IL-18 (<312.3 pg/ml)                         | 0.74<br>(0.64-0.84) | 24.0<br>(11.5-43.4) | 92.0<br>(0.86-0.95) | 3.0<br>(1.2-7.4)  | 0.83<br>(0.66-1.0)  | 3.6<br>(1.2-11.0)  |
| LIF (0/1) <sup>a</sup>                       | 0.67<br>(0.55-0.79) | 56.0<br>(37.1-73.3) | 90.8<br>(84.2-94.8) | 6.1<br>(3.1-11.7) | 0.49<br>(0.31-0.76) | 12.5<br>(4.6-34.1) |
| M-CSF (>40.8 pg/ml)                          | 0.79<br>(0.68-0.89) | 48.0<br>(30.0-66.5) | 90.6<br>(84.6-94.4) | 5.1<br>(2.6-9.8)  | 0.57<br>(0.39-0.84) | 8.9<br>(3.4-23.4)  |
| MCP-1 (>189.5 pg/ml)                         | 0.73<br>(0.63-0.83) | 28.0<br>(14.3-47.6) | 90.6<br>(84.6-94.4) | 3.0<br>(1.3-6.7)  | 0.80<br>(0.62-1.0)  | 3.7<br>(1.3-10.6)  |
| MCP-3 (>91.2 pg/ml)                          | 0.72<br>(0.62-0.81) | 32.0<br>(17.2-51.6) | 90.6<br>(84.6-94.4) | 3.4<br>(1.6-7.3)  | 0.75<br>(0.57-0.99) | 4.5<br>(1.6-12.5)  |
| $\beta$ -NGF (>14.6 pg/ml)                   | 0.74<br>(0.63-0.85) | 32.0<br>(17.2-51.6) | 92.8<br>(87.2-96.0) | 4.4<br>(1.9-10.1) | 0.73<br>(0.56-0.96) | 6.0<br>(2.1-17.4)  |
| SCF (>199.0 pg/ml)                           | 0.71<br>(0.60-0.83) | 36.0<br>(20.0-55.5) | 91.3<br>(0.85-0.95) | 4.1<br>(2.0-8.8)  | 0.70<br>(0.52-0.95) | 5.9<br>(2.2-16.2)  |
| SDF-1 $\alpha$ (>214.8 pg/ml)                | 0.72<br>(0.62-0.83) | 32.0<br>(17.2-51.6) | 94.2<br>(89.0-97.0) | 5.5<br>(2.3-13.3) | 0.72<br>(0.55-0.95) | 7.6<br>(2.5-23.0)  |

AUC, Area under curve; +LR, Positive likelihood ratio; -LR, Negative likelihood ratio; DOR, Diagnostic odds ratio; 95 % confidence intervals are given in parentheses.

<sup>a</sup> 0=undetectable value, 1=detectable value
